# Supplementary material for: PGAdb-builder: A web service tool for creating pan-genome allele database for molecular fine typing
Source: PubMed Central journal article supplement (PMC5099940; doi:10.1038/srep36213), 2016-11-08
Supplement: srep36213-s1.pdf [file srep36213-s1.pdf]

# PGAdb-builder: The web server for building microbial whole-genome multi-locus sequence typing database for molecular fine typing

Yen-Yi Liu<sup>1#</sup>, Chien-Shun Chiou<sup>1#</sup> and Chih-Chieh Chen<sup>2,3\*</sup>

**Table S1. Accession numbers of 487 *Salmonella enterica* serovar Typhimurium genomes used for testing the operation of Build\_PGAdb module of PGAdb-builder**

|                 |                 |                 |                 |
|-----------------|-----------------|-----------------|-----------------|
| GCA_000006945.1 | GCA_000493675.1 | GCA_001034525.1 | GCA_001153005.1 |
| GCA_000022165.1 | GCA_000495135.2 | GCA_001034545.1 | GCA_001153825.1 |
| GCA_000027025.1 | GCA_000495155.2 | GCA_001034565.1 | GCA_001154285.1 |
| GCA_000187785.2 | GCA_000495175.2 | GCA_001034585.1 | GCA_001154585.1 |
| GCA_000188735.1 | GCA_000495195.2 | GCA_001034595.1 | GCA_001155485.1 |
| GCA_000210855.2 | GCA_000495215.2 | GCA_001034605.1 | GCA_001159405.1 |
| GCA_000213635.1 | GCA_000495235.1 | GCA_001034615.1 | GCA_001161925.1 |
| GCA_000252875.1 | GCA_000505085.1 | GCA_001038035.1 | GCA_001162405.1 |
| GCA_000283735.1 | GCA_000505505.1 | GCA_001038085.1 | GCA_001164125.1 |
| GCA_000292755.1 | GCA_000614485.1 | GCA_001038095.1 | GCA_001164765.1 |
| GCA_000312745.2 | GCA_000636135.1 | GCA_001038105.1 | GCA_001172145.1 |
| GCA_000312765.2 | GCA_000648415.1 | GCA_001038115.1 | GCA_001172545.1 |
| GCA_000312785.2 | GCA_000648435.1 | GCA_001038165.1 | GCA_001187325.1 |
| GCA_000312805.2 | GCA_000648455.1 | GCA_001042425.1 | GCA_001187375.1 |
| GCA_000312825.2 | GCA_000648475.1 | GCA_001085145.1 | GCA_001214325.1 |
| GCA_000312845.2 | GCA_000648495.1 | GCA_001085685.1 | GCA_001214365.1 |
| GCA_000312865.2 | GCA_000715155.2 | GCA_001091445.1 | GCA_001214425.1 |
| GCA_000312885.2 | GCA_000743055.1 | GCA_001093545.1 | GCA_001214485.1 |
| GCA_000312905.2 | GCA_000784215.1 | GCA_001095425.1 | GCA_001214545.1 |
| GCA_000314915.1 | GCA_000784225.1 | GCA_001096565.1 | GCA_001214705.1 |
| GCA_000319795.2 | GCA_000784235.1 | GCA_001097045.1 | GCA_001214745.1 |
| GCA_000336155.1 | GCA_000784245.1 | GCA_001102665.1 | GCA_001214765.1 |
| GCA_000336195.1 | GCA_000784295.1 | GCA_001105145.1 | GCA_001214785.1 |
| GCA_000336215.1 | GCA_000784315.1 | GCA_001110745.1 | GCA_001214865.1 |
| GCA_000380325.1 | GCA_000786025.1 | GCA_001111905.1 | GCA_001214965.1 |
| GCA_000430145.3 | GCA_000828595.1 | GCA_001116925.1 | GCA_001215105.1 |
| GCA_000444835.1 | GCA_000941015.1 | GCA_001119985.1 | GCA_001215145.1 |
| GCA_000465175.1 | GCA_000973645.1 | GCA_001120065.1 | GCA_001215365.1 |
| GCA_000465195.1 | GCA_000973845.1 | GCA_001120665.1 | GCA_001215405.1 |
| GCA_000468255.1 | GCA_000973885.1 | GCA_001125725.1 | GCA_001215505.1 |
| GCA_000474335.1 | GCA_000973915.1 | GCA_001127885.1 | GCA_001215525.1 |
| GCA_000474355.1 | GCA_000974015.1 | GCA_001129385.1 | GCA_001215545.1 |
| GCA_000474395.1 | GCA_000974095.1 | GCA_001130025.1 | GCA_001215585.1 |
| GCA_000474475.1 | GCA_000974125.1 | GCA_001130925.1 | GCA_001215665.1 |
| GCA_000474495.1 | GCA_000974215.1 | GCA_001131525.1 | GCA_001215685.1 |
| GCA_000474555.1 | GCA_000993725.1 | GCA_001135785.1 | GCA_001215725.1 |
| GCA_000474575.1 | GCA_001026705.1 | GCA_001137885.1 | GCA_001215765.1 |
| GCA_000486105.1 | GCA_001027585.1 | GCA_001139325.1 | GCA_001215785.1 |
| GCA_000486125.1 | GCA_001027595.1 | GCA_001140725.1 | GCA_001215865.1 |
| GCA_000486345.1 | GCA_001027605.1 | GCA_001144305.1 | GCA_001215885.1 |
| GCA_000493535.1 | GCA_001027615.1 | GCA_001146465.1 | GCA_001215925.1 |
| GCA_001215985.1 | GCA_001218065.1 | GCA_001219265.1 | GCA_001220525.1 |
| GCA_001216085.1 | GCA_001218085.1 | GCA_001219285.1 | GCA_001220545.1 |



|                 |                 |                 |
|-----------------|-----------------|-----------------|
| GCA_001221885.1 | GCA_001223245.1 | GCA_001244385.1 |
| GCA_001221905.1 | GCA_001223265.1 | GCA_001244695.1 |
| GCA_001221925.1 | GCA_001223285.1 | GCA_001244705.1 |
| GCA_001221945.1 | GCA_001223305.1 |                 |
| GCA_001221985.1 | GCA_001223325.1 |                 |
| GCA_001222005.1 | GCA_001223345.1 |                 |
| GCA_001222025.1 | GCA_001223365.1 |                 |
| GCA_001222065.1 | GCA_001223405.1 |                 |
| GCA_001222085.1 | GCA_001223445.1 |                 |
| GCA_001222125.1 | GCA_001223465.1 |                 |
| GCA_001222145.1 | GCA_001223505.1 |                 |
| GCA_001222165.1 | GCA_001223525.1 |                 |
| GCA_001222185.1 | GCA_001223545.1 |                 |
| GCA_001222205.1 | GCA_001240475.1 |                 |
| GCA_001222225.1 | GCA_001240785.1 |                 |
| GCA_001222245.1 | GCA_001240805.1 |                 |
| GCA_001222325.1 | GCA_001240825.1 |                 |
| GCA_001222345.1 | GCA_001240925.1 |                 |
| GCA_001222365.1 | GCA_001240935.1 |                 |
| GCA_001222385.1 | GCA_001240965.1 |                 |
| GCA_001222405.1 | GCA_001240975.1 |                 |
| GCA_001222465.1 | GCA_001241075.1 |                 |
| GCA_001222485.1 | GCA_001241165.1 |                 |
| GCA_001222505.1 | GCA_001241425.1 |                 |
| GCA_001222525.1 | GCA_001241505.1 |                 |
| GCA_001222565.1 | GCA_001241515.1 |                 |
| GCA_001222585.1 | GCA_001241555.1 |                 |
| GCA_001222605.1 | GCA_001241585.1 |                 |
| GCA_001222625.1 | GCA_001241605.1 |                 |
| GCA_001222645.1 | GCA_001241895.1 |                 |
| GCA_001222665.1 | GCA_001241905.1 |                 |
| GCA_001222705.1 | GCA_001241945.1 |                 |
| GCA_001222725.1 | GCA_001241975.1 |                 |
| GCA_001222765.1 | GCA_001242275.1 |                 |
| GCA_001222785.1 | GCA_001242345.1 |                 |
| GCA_001222825.1 | GCA_001242395.1 |                 |
| GCA_001222865.1 | GCA_001242565.1 |                 |
| GCA_001222885.1 | GCA_001243095.1 |                 |
| GCA_001222905.1 | GCA_001243105.1 |                 |
| GCA_001222945.1 | GCA_001243255.1 |                 |
| GCA_001222965.1 | GCA_001243395.1 |                 |
| GCA_001223025.1 | GCA_001243425.1 |                 |
| GCA_001223045.1 | GCA_001243505.1 |                 |
| GCA_001223085.1 | GCA_001243555.1 |                 |
| GCA_001223105.1 | GCA_001243695.1 |                 |
| GCA_001223125.1 | GCA_001243815.1 |                 |
| GCA_001246265.1 | GCA_001245125.1 |                 |
| GCA_001246565.1 | GCA_001245415.1 |                 |
| GCA_001246625.1 | GCA_001245495.1 |                 |
| GCA_001246695.1 | GCA_001245535.1 |                 |
| GCA_001246705.1 | GCA_001245645.1 |                 |
| GCA_001246875.1 | GCA_001246225.1 |                 |
